# Supplementary material for: Comparison of Monoclonal Antibodies targeting CD38, SLAMF7 and PD-1/PD-L1 in combination with Bortezomib/Immunomodulators plus Dexamethasone/Prednisone for the treatment of Multiple Myeloma: An Indirect-Comparison Meta-Analysis of Randomized Controlled Trials
Source: Research Square preprint supplement (doi:10.21203/rs.3.rs-132450/v1), 2020-12-28
Supplement: Supplementary file 1 [file 8fd9f16381019f988d655054.docx]

**Table 1 Characteristics of the Patients at Baseline.**

| Study | POLLUX  T C | CASTOR  T C | NCT02252172  T C | ALCYONE  T C | ICARIA-MM  T C | CASSIOPEIA  T C |
| --- | --- | --- | --- | --- | --- | --- |
| Number of patients | 286 283 | 251 247 | 368 369 | 350 356 | 154 153 | 543 524 |
| Median age(year) | 65 65 | 64 64 | 73 74 | 71 71 | 68 66 | 59 58 |
| ECOG‡performance status -no. (%) |  |  |  |  |  |  |
| 0 | 139(48.6)150(53.0) | NA NA | 127(34.5) 123(33.3) | 78(22.3) 99(27.8) | NA NA | 265(49)257(47) |
| 1 | NA NA | NA NA | 178(48.4)187 (50.7) | 182(52.0)173(48.6) | NA NA | 225(41)230(42) |
| 2 | NA NA | NA NA | 63 (17.1) 59 (16.0) | 90 (25.7) 84 (23.6) | NA NA | 53(10) 55(10) |
| ISS§ disease stage -no. (%) |  |  |  |  |  |  |
| 1 | 137(47.9)140(49.5) | 98(39.0)96(38.9) | 98 (26.6) 103 (27.9) | 69 (19.7) 67 (18.8) | 64 (42) 51 (33) | 204(38)228(42) |
| 2 | 93 (32.5) 86 (30.4) | 94(37.5)100(40.5) | 163(44.3)156 (42.3) | 139(39.7)160 (44.9) | 53(34) 56 (37) | 255(47)233(43) |
| 3 | 56 (19.6) 57 (20.1) | 59(23.5) 51 (20.6) | 107(29.1)110 (29.8) | 142(40.6)129 (36.2) | 34(22) 43 (28) | 84(15) 81(15) |
| Cytogenetic profile -no. (%) |  |  |  |  |  |  |
| Standard risk | T:193/228(84.6)  C: 176/211(83.4) | T:140/181(77.3) C:137/174 (78.7) | T:271/319(85.0) C:279/323 (86.4) | T:261/314(83.1) C:257/302 (85.1) | 103(67) 78(51) | T:460/542(85) C:454/540 (84) |
| High risk | T:35/228(15.4) C:35/211 (16.6) | T:41/181(22.7) C:37/174 (21.3) | T:48/319(15.0) C:44/323 (13.6) | T:53/314(16.9) C:45/302 (14.9) | 24(16) 36 (24) | T:82/542(15) C:86/540 (16) |
| Median time since initial diagnosis | 3.5yr 4.0yr | 3.87yr 3.72yr | 0.95M 0.89 M | 0.8M 0.8M | 4.46yr 4.09yr | 0.92M 0.92M |
| Median no. of previous lines of therapy | 1 1 | 2 2 | 0 0 | 0 0 | 3 3 | 0 0 |

‡ Eastern Cooperative Oncology Group (ECOG) performance status is scored on a scale from 0 to 5, with 0 indicating no symptoms and higher scores

indicating increasing disability

§ The International Staging System (ISS) disease stage is derived on the basis of the combination of serum β2microglobulin and albumin levels.

Higher stages indicate more advanced disease.

Abbreviation：NA, not available T, trail C, control M, month

**Table 2 Characteristics of the Patients at Baseline.**

| Study | KEYNOTE-183  T C | KEYNOTE-185  T C | NCT01478048  T C | ELOQUENT-3  T C | ELOQUENT-2  T C |
| --- | --- | --- | --- | --- | --- |
| Number of patients | 125 124 | 151 150 | 77 75 | 60 57 | 321 325 |
| Median age(year) | 65 67 | 74 74 | 65 65 | 69 66 | 67 66 |
| ECOG‡ performance status -no. (%) |  |  |  |  |  |
| 0 | 60 (48) 60 (48) | 51 (34) 55 (37) | 38 (49) 46 (61) | NA NA | NA NA |
| 1 | 65 (52) 64 (52) | 100 (66) 92(61) | 35 (46) 23 (31) | NA NA | NA NA |
| 2 | 0 0 | 0 1 (1) | 2 (3) 6 (8) | NA NA | NA NA |
| ISS§ disease stage -no. (%) |  |  |  |  |  |
| 1 | 45 (36) 45 (36) | 38 (25) 51 (34) | 26 (34) 19 (25) | (1 or 2)  53 (88) 50 (88) | 141(44) 138 (42) |
| 2 | 46 (37) 39 (31) | 68 (45) 66 (44) | 23 (30) 20 (27) | 102(32) 105(32) |
| 3 | 33 (26) 33 (27) | 44 (29) 31 (21) | 11 (14) 16 (21) | 7 (12) 7 (12) | 66 (21) 68 (21) |
| Cytogenetic profile -no. (%) |  |  |  |  |  |
| Standard risk | 52 (42) 71 (57) | 93 (62) 89 (59) | NA NA | NA NA | NA NA |
| High risk | 28 (22) 17 (14) | 24 (16) 10 (7) | NA NA | NA NA | NA NA |
| Median time since initial diagnosis | NA NA | NA NA | 45M 44M | 4.8yr 4.4yr | NA NA |
| Median no. of previous lines of therapy | 3 3 | 0 0 | NA NA | 3 3 | 2 2 |

‡ Eastern Cooperative Oncology Group (ECOG) performance status is scored on a scale from 0 to 5, with 0 indicating no symptoms and higher

scores indicating increasing disability.

§ The International Staging System (ISS) disease stage is derived on the basis of the combination of serum β2microglobulin and albumin

levels. Higher stages indicate more advanced disease.

Abbreviation：NA, not available T, trail C, control M, month
